# Supplementary material for: 2C-Cas9: a versatile tool for clonal analysis of gene function
Source: HighWire-hosted journal article supplement (doi:10.1101/gr.196170.115), 2016-03-08
Supplement: Supp_Legends.docx [file Supp_Legends.docx]

**Figure S1 Mutagenesis efficiency at the *tyr* locus in the *Tg(rpl5b:Gal4)* line**

(A) Left panel: whole mount image of *Tg(rpl5b:Gal4)* embryos transiently expressing the p*UAS:Cas9T2AGFP;U6:tyrsgRNA1;U6:tyrsgRNA2* used for FACS analysis. Right panel: double transgenic *Tg(rpl5b:Gal4) x Tg(UAS:RFP; cry:GFP)* larvae. RFP is used as an independent reporter of Gal4 transactivation and confirms non-ectopic expression of the p*UAS:Cas9T2AGFP;U6:tyrsgRNA1;U6:tyrsgRNA2.*

(B) Representative mutations at the *tyr* locus.

**Figure S2 *Gal4* expression domains in the *Tg(rx2:Gal4; myl7:GFP)* and *Tg(rpl5b:Gal4)* lines**

(A) Confocal image of Gal4-induced eye-specific expression of *UAS:RFP* in a 24 hpf double transgenic *Tg(rx2:Gal4; myl7:GFP) x Tg(UAS:RFP; cry:GFP)* embryo. Scale bar: 100m.

(B) Confocal image of muscle cells expressing *UAS:RFP* in a 5 dpf double transgenic *Tg(rpl5b:Gal4) x Tg(UAS:RFP; cry:GFP)* embryo. Scale bar: 50m.

**Table S1 Sequence and efficiency of the sgRNAs used in this study.**

The mutagenesis rate was assessed by injection of in vitro transcribed sgRNA with synthetic Cas9 mRNA into one-cell stage wild-type embryos. To estimate the number of mutations induced we extracted DNA from a pool of 25 injected embryos and subsequently PCR amplified the targeted locus. Single PCR amplicons were sequenced and mutant alleles were identified after alignment with the wild-type sequence.

**Table S2 Transgenic lines used in the report**
