# Supplementary material for: 2C-Cas9: a versatile tool for clonal analysis of gene function
Source: HighWire-hosted journal article supplement (doi:10.1101/gr.196170.115), 2016-03-08
Supplement: Supp_Table_S1.docx [file Supp_Table_S1.docx]

| sgRNA name | Target gene | Target sequence | Mutagenesis efficiency |
| --- | --- | --- | --- |
| TyrsgRNA1 | Tyrosinase | GGACTGGAGGACTTCTGGGG | 90% (18/20) |
| TyrsgRNA2 | Tyrosinase | GGCGTTTCTGCCTTGGCATC | 10% (2/20) |
| Ath5sgRNA1 | Ath5 | GGCATATAAACCCAATCCAC | 20% (4/20) |
| Ath5sgRNA2 | Ath5 | GGCCGAGCTGTGCAGACTCC | 13% (4/32) |
| Kif5aasgRNA1 | Kif5aa | GGAATGATGCCCATCTGCTG | 22% (4/18) |
| Kif5aasgRNA2 | Kif5aa | GGGACGACACGGTCATCATC | 38% (6/16) |
| Pvalb6sgRNA | Pvalb6 | CGCTATTGTCGGCATCCAGG | 47% (9/19) |
| ctlsgRNA1 | RFP | GGCCACGAGTTCGAGATCGA | - |
| ctlsgRNA2 | RFP | GGACATCACCTCCCACAACG | - |
