# Supplementary material for: 2C-Cas9: a versatile tool for clonal analysis of gene function
Source: HighWire-hosted journal article supplement (doi:10.1101/gr.196170.115), 2016-03-08
Supplement: Supp_Table_S2.docx [file Supp_Table_S2.docx]

| **Transgenic or mutant zebrafish line used in this study** | **Gene** | **Description** | **Original Reference** |
| --- | --- | --- | --- |
| *kif5aa**162 +/- | *kif5aa* | TALEN mediated loss-of-function allele of *kif5aa.* | (Auer et al., 2015) |
| *Tg(isl2b:Gal4)* |  | A promoter fragment of the *isl2b* gene drives expression of the Gal4 transactivator in the entire RGC population of the retina. | ([Ben Fredj et al., 2010](#_ENREF_11)) |
| *Tg(gSA2AzGFF49A)* |  | Transgenic line generated by gene-trap approach. An optimized version of the Gal4 (GFF) is expressed in periventricular neurons (PVNs) at the level of the optic tectum (OT). | ([Muto et al., 2013](#_ENREF_59)) |
| *Tg(rpl5b:Gal4)* |  | A promoter fragment of the *rpl5b* ribosomalgene drives quasi-ubiquitous expression of the *Gal4* transactivator. | generated in this report |
| *Tg(s1020t)* |  | Transgenic line generated by an enhancer-trap screen. *Gal4* is expressed in the thalamus, spinal cord and bipolar cells of the retina. | ([Scott and Baier, 2009](#_ENREF_26)) |
| *Tg(mnx1:Gal4)* |  | A promoter containing three copies of the *mnx1* enhancer drives the expression of *Gal4* in spinal cord primary motor neurons. | (Zelenchuch and Brusés, 2011) |
| *Tg(rx2:Gal4;*  *myl7:GFP )* |  | A promoter fragment of the *rx2* gene drives expression of *Gal4* in retinal progenitors. The heart-specific promoter *myl7* drives *GFP* (*myl7:GFP)* as transgenesis marker. | generated in this report |
| *Tg(UAS:Cas9T2AGFP;U6sgRNA1*  *;U6sgRNA2)* |  | The simultaneous expression of the *Cas9* endonuclease and the *GFP* reporter depends on the activation of an UAS. Two sgRNAs empty expression cassettes are present. | generated in this report |
| *Tg(UAS:Cas9T2AGFP;U6tyrsgRNA1*  *;U6tyrsgRNA2)* | *tyr* | The simultaneous expression of the *Cas9* endonuclease and the *GFP* reporter depends on the activation of an UAS. Two *U6* promoter sequences drive the transcription of sgRNAs targeting the *tyrosinase* gene. | generated in this report |
| *Tg(-3.5ubb:loxP-lacZ-loxP-eGFP)*cn2 |  | The ubiquitin promoter (Mosimann et al, 2011) is placed 5’ of a floxed lacZ sequence followed by GFP cDNA. Expression of *GFP* in the lens driven by a crystalline promoter fragment (cry) is used as transgenesis reporter. | generated in this report |
| *Tg(UAS:Brb1.0L)s1997t* |  | The expression of a Brainbow cassette ([Pan et al., 2013](#_ENREF_23)) is dependent of the activation of an upstream activator sequence (UAS). | (Robles et al., 2013) |
| *Tg(UAS:RFP; cry:GFP)* |  | A UAS drives the Gal4-mediated transcription of the cDNA sequence of the red fluorescent protein (RFP). Expression of *GFP* in the lens driven by a crystalline promoter fragment (cry) is used as transgenesis reporter. | ([Auer et al., 2014](#_ENREF_5)) |

Supplementary Table 2
